# Supplementary material for: Disrupting Mosquito Reproduction and Parasite Development for Malaria Control
Source: PubMed Central journal article supplement (PMC5158081; doi:10.1371/journal.ppat.1006060), 2016-12-15
Supplement: ppat.1006060.s001.pdf [file ppat.1006060.s001.pdf]

**S1 Table. Model parameters.** Symbol, description, standard value used, and reference for the parameters found in the model.

| Symbol                         | Description                                                           | Value                                                                      | Reference        |
|--------------------------------|-----------------------------------------------------------------------|----------------------------------------------------------------------------|------------------|
| <b>Structural parameters</b>   |                                                                       |                                                                            |                  |
| $t_e$                          | Duration of egg stage (days)                                          | 3                                                                          | [1]              |
| $t_l$                          | Duration of larval and pupae stages (days)                            | 10                                                                         | [2]              |
| $n_g$                          | Maximum number of gonotrophic cycles                                  | 6                                                                          | [3]              |
| <b>Lifecycle parameters</b>    |                                                                       |                                                                            |                  |
| $d_e$                          | Egg mortality (per day)                                               | 0.2                                                                        | text             |
| $d_l^{min}$                    | Baseline larva mortality (per day)                                    | 0.035                                                                      | [4]              |
| $d_l^{max}$                    | Maximum larva mortality (per day)                                     | 0.4                                                                        | [4]              |
| $d_a$                          | Adult mortality without intervention (per day)                        | varies                                                                     | S3 Fig, S2 Table |
| $p_m$                          | Probability of mating before feeding                                  | 0.5                                                                        | [5]              |
| $n_e$                          | Number of eggs per batch                                              | 60                                                                         | [6]              |
| $K$                            | Larval carry capacity                                                 | 10,000                                                                     | text             |
| <b>Malaria parameters</b>      |                                                                       |                                                                            |                  |
| $S$                            | Length of sporogony (days)                                            | 12                                                                         | [7]              |
| $b$                            | Risk of transmission from mosquito to human per infectious bite       | 0.55                                                                       | [8]              |
| $D$                            | Length of infectious period of humans (days)                          | 75                                                                         | [9]              |
| $N$                            | Bites per mosquito per human per day                                  | $2.15 \cdot 10^{-2}$ ,<br>$3.78 \cdot 10^{-3}$ ,<br>$1.09 \cdot 10^{-3}\#$ | text             |
| $q$                            | Maximum risk of transmission from human to feeding mosquito (per day) | 0.1                                                                        | text             |
| <b>Intervention parameters</b> |                                                                       |                                                                            |                  |
| $h_m$                          | Effective reduction in mating due to DBH                              | 0.25, 0.54, 0.65 <sup>&amp;</sup>                                          | text             |
| $h_e$                          | Effective reduction in egg batch size due to DBH                      | 0.26, 0.69, 0.95 <sup>&amp;</sup>                                          | text             |
| $h_d$                          | Additional mortality due to DBH                                       | Varies <sup>&amp;</sup>                                                    | S3 Fig, S2 Table |
| $h_s$                          | Effective reduction in <i>Plasmodium</i> susceptibility               | 0.16, 0.56, 0.87 <sup>&amp;</sup>                                          | text             |
| $d_c$                          | Additional mortality due to insecticide                               | 0.8                                                                        | text             |

#Bites per mosquito per human per day (N) varies with transmission and has three values corresponding to low, moderate and high transmission.

&Intervention parameters ( $h_m$ ,  $h_e$ ,  $h_d$ ,  $h_s$ ) have three values corresponding to increasing levels of DBH: 0.125  $\mu$ g DBH, 0.5  $\mu$ g DBH and 2.0  $\mu$ g DBH.

1. Yaro AS, Dao A, Adamou A, Crawford JE, Ribeiro JM, Gwadz R, et al. The distribution of hatching time in *Anopheles gambiae*. Malaria journal. 2006;5:19. doi: 10.1186/1475-2875-5-19. PubMed PMID: 16553960; PubMed Central PMCID: PMC1479351.
2. Bayoh MN, Lindsay SW. Temperature-related duration of aquatic stages of the Afrotropical malaria vector mosquito *Anopheles gambiae* in the laboratory. Medical and veterinary entomology. 2004;18(2):174-9. doi: 10.1111/j.0269-283X.2004.00495.x. PubMed PMID: 15189243.
3. Gillies MT, Wilkes TJ. A study of the age-composition of populations of *Anopheles gambiae* Giles and *A. funestus* Giles in North-Eastern Tanzania. Bulletin of entomological research. 1965;56(2):237-62. Epub 1965/12/01. PubMed PMID: 5854754.
4. White MT, Griffin JT, Churcher TS, Ferguson NM, Basanez MG, Ghani AC. Modelling the impact of vector control interventions on *Anopheles gambiae* population dynamics. Parasites & vectors. 2011;4:153. doi: 10.1186/1756-3305-4-153. PubMed PMID: 21798055; PubMed Central PMCID: PMC3158753.
5. Charlwood JD, Pinto J, Sousa CA, Ferreira C, Petrarca V, Rosario Vdo E. 'A mate or a meal'--pre-gravid behaviour of female *Anopheles gambiae* from the islands of Sao Tome and Principe, West Africa. Malaria journal. 2003;2:9. doi: 10.1186/1475-2875-2-9. PubMed PMID: 12801421; PubMed Central PMCID: PMC161788.
6. Dieter KL, Huestis DL, Lehmann T. The effects of oviposition-site deprivation on *Anopheles gambiae* reproduction. Parasites & vectors. 2012;5:235. doi: 10.1186/1756-3305-5-235. PubMed PMID: 23072301; PubMed Central PMCID: PMC3514158.
7. Baton LA, Ranford-Cartwright LC. Spreading the seeds of million-murdering death: metamorphoses of malaria in the mosquito. Trends in parasitology. 2005;21(12):573-80. Epub 2005/10/21. doi: 10.1016/j.pt.2005.09.012. PubMed PMID: 16236552.
8. Smith DL, Drakeley CJ, Chiyaka C, Hay SI. A quantitative analysis of transmission efficiency versus intensity for malaria. Nat Commun. 2010;1:108. doi: 10.1038/ncomms1107. PubMed PMID: 21045826; PubMed Central PMCID: PMC3065713.
9. Collins WE, Jeffery GM. A retrospective examination of mosquito infection on humans infected with *Plasmodium falciparum*. The American journal of tropical medicine and hygiene. 2003;68(3):366-71. PubMed PMID: 12685646.
