# Supplementary material for: Disrupting Mosquito Reproduction and Parasite Development for Malaria Control
Source: PubMed Central journal article supplement (PMC5158081; doi:10.1371/journal.ppat.1006060), 2016-12-15
Supplement: ppat.1006060.s002.pdf [file ppat.1006060.s002.pdf]

**S2 Table. Daily mortality rates.** Daily mortality rates as calculated from the experimental results from Fig 1.

| <b>day</b> | <b>no intervention</b> | <b>0.125 µg DBH</b> | <b>0.5 µg DBH</b> | <b>2.0 µg DBH</b> |
|------------|------------------------|---------------------|-------------------|-------------------|
| 0          | 0.00                   | 0.00                | 0.00              | 0.00              |
| 1          | 0.00                   | 0.00                | 0.00              | 0.00              |
| 2          | 0.00                   | 0.00                | 0.00              | 0.00              |
| 3          | 0.04                   | 0.03                | 0.04              | 0.26              |
| 4          | 0.03                   | 0.01                | 0.04              | 0.04              |
| 5          | 0.02                   | 0.01                | 0.04              | 0.03              |
| 6          | 0.00                   | 0.03                | 0.00              | 0.00              |
| 7          | 0.02                   | 0.05                | 0.02              | 0.01              |
| 8          | 0.02                   | 0.03                | 0.05              | 0.10              |
| 9          | 0.01                   | 0.03                | 0.10              | 0.10              |
| 10         | 0.04                   | 0.02                | 0.05              | 0.08              |
| 11         | 0.03                   | 0.01                | 0.04              | 0.14              |
| 12         | 0.06                   | 0.10                | 0.11              | 0.16              |
| 13         | 0.07                   | 0.11                | 0.12              | 0.20              |
| 14         | 0.07                   | 0.12                | 0.14              | 0.24              |
| 15         | 0.08                   | 0.23                | 0.16              | 0.22              |
| 16         | 0.09                   | 0.31                | 0.20              | 0.28              |
| 17         | 0.22                   | 0.21                | 0.20              | 0.14              |
| 18         | 0.29                   | 0.26                | 0.25              | 0.17              |
| 19         | 0.41                   | 0.35                | 0.33              | 0.20              |
| 20         | 0.41                   | 0.35                | 0.33              | 0.20              |
| 21         | 0.41                   | 0.35                | 0.33              | 0.20              |
| 22         | 0.41                   | 0.35                | 0.33              | 0.20              |
| 23         | 0.41                   | 0.35                | 0.33              | 0.20              |
| 24         | 0.41                   | 0.35                | 0.33              | 0.20              |
| 25         | 0.41                   | 0.35                | 0.33              | 0.20              |
| 26         | 0.41                   | 0.35                | 0.33              | 0.20              |
